# Supplementary material for: microRNA network analysis identifies miR-29 cluster as key regulator of LAMA2 in ependymoma
Source: Acta Neuropathol Commun. 2015 May 10;3:26. doi: 10.1186/s40478-015-0206-2 (PMC4425904; doi:10.1186/s40478-015-0206-2)
Supplement: Additional file 1: Table S1. — Characteristics of ependymoma patients used in the current study. Table S2. Putative miRNA – target interactions from Ependymoma expression data. Table S3. Enrichment of biological processes and pathways. Table S4. Differential expression of miRNA target genes in PF subgroups. [file 40478_2015_206_MOESM1_ESM.pdf]

<?xml version="1.0" encoding="UTF-8" standalone="no"?><!DOCTYPE Article PUBLIC "-//Springer-Verlag//DTD A++ V2.4//EN" "http://devel.springer.de/A++/V2.4/DTD/A++V2.4.dtd"><Article OutputMedium="All" ID="s40478-015-0206-2"><ArticleInfo Language="En" ArticleType="Letter" NumberingStyle="Unnumbered" TocLevels="0" ContainsESM="Yes" OutputMedium="All" ArticleCitation="ArticleSequenceNumber"><ArticleID>206</ArticleID><ArticleDOI>10.1186/s40478-015-0206-2</ArticleDOI><ArticleSequenceNumber>0</ArticleSequenceNumber><ArticleTitle Language="En" OutputMedium="All">microRNA network analysis identifies miR-29 <?show [?A3B2 twb=.27w?]?><?show [?A3B2 tlsb=-.09pt?]?><?show [?A3B2 bk?]?>cluster<?show [?A3B2 ek?]?> as key regulator of LAMA2 in ependymoma</ArticleTitle><ArticleCategory>Letter to the Editor</ArticleCategory><ArticleFirstPage>1</ArticleFirstPage><ArticleLastPage>5</ArticleLastPage><ArticleHistory><RegistrationDate><Year>2015</Year><Month>4</Month><Day>27</Day></RegistrationDate><Received><Year>2015</Year><Month>4</Month><Day>23</Day></Received><Accepted><Year>2015</Year><Month>4</Month><Day>26</Day></Accepted><OnlineDate><Year><?InsertOnReleaseOF OFYear?></Year><Month><?InsertOnReleaseOF OFMonth?></Month><Day><?InsertOnReleaseOF OFDay?></Day></OnlineDate></ArticleHistory><ArticleCopyright><CopyrightHolderName>Lourdusamy et al.; licensee BioMed Central.</CopyrightHolderName><CopyrightYear>2015</CopyrightYear><CopyrightComment><SimplePara>This is an Open Access article distributed under the terms of the Creative Commons Attribution License (<ExternalRef><RefSource>http://creativecommons.org/licenses/by/4.0</RefSource><RefTarget TargetType="URL" Address="http://creativecommons.org/licenses/by/4.0"/></ExternalRef>), which permits unrestricted use, distribution, and reproduction in any medium, provided the original work is properly credited. The Creative Commons Public Domain Dedication waiver (<ExternalRef><RefSource>http://creativecommons.org/publicdomain/zero/1.0/</RefSource><RefTarget TargetType="URL" Address="http://creativecommons.org/publicdomain/zero/1.0/"/></ExternalRef>) applies to the data made available in this article, unless otherwise stated.</SimplePara></CopyrightComment></ArticleCopyright><ArticleGrants Type="OpenChoice"><MetadataGrant Grant="OpenAccess"/><AbstractGrant Grant="OpenAccess"/><BodyPDFGrant Grant="OpenAccess"/><BodyHTMLGrant Grant="OpenAccess"/><BibliographyGrant Grant="OpenAccess"/><ESMGrant Grant="OpenAccess"/></ArticleGrants><ArticleContext><JournalID>40478</JournalID><VolumeIDStart><?InsertByIssueBuilding VolumeIDStart?></VolumeIDStart><VolumeIDEnd><?InsertByIssueBuilding VolumeIDEnd?></VolumeIDEnd><IssueIDStart><?InsertByIssueBuilding IssueIDStart?></IssueIDStart><IssueIDEnd><?InsertByIssueBuilding IssueIDEnd?></IssueIDEnd></ArticleContext></ArticleInfo><ArticleHeader><AuthorGroup><Author CorrespondingAffiliationID="Aff1" AffiliationIDS="Aff1"><!-- Query ID="Q1" Text="The email address of “Anbarasu Lourdusamy” provided in the manuscript (arockia.lourdusamy@nottingham.ac.uk) differs from the one reflected in the submission system (anbarasu.lourdusamy@nottingham.ac.uk). We have proceeded and followed the manuscript. Please check and advise if action taken is appropriate." --><AuthorName><GivenName>Anbarasu</GivenName><FamilyName>Lourdusamy</FamilyName></AuthorName><Contact><Email>arockia.lourdusamy@nottingham.ac.uk</Email></Contact></Author><Author AffiliationIDS="Aff1"><!-- Query ID="Q2" Text="Author details: Journal instruction requires author’s email address; however, this was not provided for “Ruman Rahman, Stuart Smith and Richard Grundy, ”. A temporary email address was presented. Please supply the correct email address of the said author." --><AuthorName><GivenName>Ruman</GivenName><FamilyName>Rahman</FamilyName></AuthorName><Contact><Email>arockia.lourdusamy@nottingham.ac.uk</Email></Contact></Author><Author AffiliationIDS="Aff1"><AuthorName><GivenName>Stuart</GivenName><FamilyName>Smith</FamilyName></AuthorName><Contact><Email>arockia.lourdusamy@nottingham.ac.uk</Email></Contact></Author><Author AffiliationIDS="Aff1"><AuthorName><GivenName>Richard</GivenName><FamilyName>Grundy</FamilyName></AuthorName><Contact><Email>arockia.lourdusamy@nottingham.ac.uk</Email></Contact></Author><Affiliation ID="Aff1"><!-- Query ID="Q3" Text="Please check if the affiliations are presented/captured correctly." --><OrgName>Children’s Brain Tumour Research Centre, School of Medicine, Queen’s Medical Centre, University of Nottingham</OrgName><OrgAddress><City>Nottingham</City><Postcode>NG7 2UH</Postcode><Country>UK</Country></OrgAddress></Affiliation></AuthorGroup><KeywordGroup Language="En" OutputMedium="All"><Heading>Keywords</Heading><Keyword>microRNA</Keyword><Keyword>Ependymoma</Keyword><Keyword>Regulatory network</Keyword><Keyword>Microarray</Keyword></KeywordGroup><AbbreviationGroup><Heading>Abbreviations</Heading><DefinitionList><DefinitionListEntry><Term>EPN</Term><Description><Para ID="Par1">Ependymoma</Para></Description></DefinitionListEntry><DefinitionListEntry><Term>miRNA</Term><Description><Para ID="Par2">micro RNA</Para></Description></DefinitionListEntry><DefinitionListEntry><Term>ECM</Term><Description><Para ID="Par3">Extra cellular matrix</Para></Description></DefinitionListEntry><DefinitionListEntry><Term>TCGA</Term><Description><Para ID="Par4">The Cancer Genome Atlas</Para></Description></DefinitionListEntry><DefinitionListEntry><Term>PF</Term><Description><Para ID="Par5">Posterior fossa</Para></Description></DefinitionListEntry><DefinitionListEntry><Term>ST</Term><Description><Para ID="Par6">Supratentorial</Para></Description></DefinitionListEntry><DefinitionListEntry><Term>SP</Term><Description><Para ID="Par7">Spinal</Para></Description></DefinitionListEntry><DefinitionListEntry><Term>PFA</Term><Description><Para ID="Par8">Posterior fossa subgroup A</Para></Description></DefinitionListEntry><DefinitionListEntry><Term>PFB</Term><Description><Para ID="Par9">Posterior fossa subgroup B</Para></Description></DefinitionListEntry></DefinitionList></AbbreviationGroup><ArticleNote Type="ESMHint"><Heading>Electronic supplementary material</Heading><SimplePara>The online version of this article (doi:<ExternalRef><RefSource>10.1186/s40478-015-0206-2</RefSource><RefTarget TargetType="DOI" Address="10.1186/s40478-015-0206-2"/></ExternalRef>) contains supplementary material, which is available to authorized users.</SimplePara></ArticleNote></ArticleHeader><Body><Para ID="Par10">Ependymomas (EPN) are enigmatic tumors which continue to present significant management challenges to clinicians as evidenced by the failure to cure up to 40% <?show [?A3B2 twb=.27w?]?><?show [?A3B2 tlsb=-.09pt?]?>of cases [<CitationRef CitationID="CR1">1</CitationRef>]. Recent genomic and epigenomic studies have identified alterations in DNA copy number, gene expression [<CitationRef CitationID="CR2">2</CitationRef>,<CitationRef CitationID="CR3">3</CitationRef>], and methylation [<CitationRef CitationID="CR4">4</CitationRef>] and showed that EPN is a heterogeneous disease and consists of distinct molecular subtypes. However, the involvement of the microRNAs (miRNA) and their influence over mRNA translation into proteins, in EPN and their contribution to the complexity of the disease are still poorly understood.</Para><Para ID="Par11">To identify miRNA - mRNA regulatory network, we systematically evaluated miRNA - mRNA associations using expression profiles of tumors from 64 EPN patients (mean age of 13.3 years, Additional file <InternalRef RefID="MOESM1">1</InternalRef>: Table S1 for more details). For each miRNA-mRNA pair, we measured the association between miRNA and mRNA using a Spearman rank correlation and filtered with sequence-based predicted miRNA-target interactions of miRanda and TargetScan databases [<CitationRef CitationID="CR5">5</CitationRef>,<CitationRef CitationID="CR6">6</CitationRef>]. We selected miRNA-mRNA pairs with strong negative correlation (FDR &lt; 0.005, 78,934 pairs) and evidence for target interaction <?show [?A3B2 twb=.27w?]?><?show [?A3B2 tlsb=-.09pt?]?>as predicted by miRanda (score &lt; −0.5), TargetScan (context score &lt; −0.2) and evolutionary conservation (miRanda conservation score &gt; 0.5). We used these thresholds to obtain a high-confidence list of candidate miRNA-target interactions. The combination of the correlation and target <?show [?A3B2 twb=.3w?]?><?show [?A3B2 tlsb=.09pt?]?>prediction filters yielded 390 miRNA-mRNA pairs, significantly<?show [?A3B2 twb=.27w?]?><?show [?A3B2 tlsb=-.09pt?]?> more than was expected by chance (<Emphasis Type="Italic">P</Emphasis> = 5.95 × 10<Superscript>−08</Superscript>, two-tailed binomial test, <Emphasis Type="Italic">x</Emphasis> = 390, <Emphasis Type="Italic">n</Emphasis> = 78,934, <?show [?A3B2 show\         ?]?><Emphasis Type="Italic">p</Emphasis> = 3.71 × 10<Superscript>−03</Superscript> = 28,309 predicted targets/7,623,897 total pairs). These 390 putative target interactions from EPN <?show [?A3B2 twb=.3w?]?><?show [?A3B2 tlsb=.09pt?]?>consisted of 107 evolutionarily conserved miRNAs and 305 target mRNAs (Additional file <InternalRef RefID="MOESM1">1</InternalRef>: Table S2). Remarkably, these miRNAs are significantly enriched for oncomiRs/tumor suppressor miRNAs (2.01 fold enrichment; P = 9.41 × 10<Superscript>−03</Superscript>, Fisher’s exact test. Additional file <InternalRef RefID="MOESM2">2</InternalRef>: <?show [?A3B2 twb=.27w?]?><?show [?A3B2 tlsb=-.09pt?]?>Figure S1). They included let-7c, miR-125b, miR-29a/b, miR-15 family – miR-15a, miR-16, and miR-196 (tumor suppressors miRNA), miR-18a/b, miR-19a/b, and miR-17 family – miR-106a/b, miR-17, miR-20a/b, and miR-93 (onco miRNA). Growing evidences suggest that miR-17 miRNAs are involved in cell proliferation, development, and stem cell differentiation [<CitationRef CitationID="CR7">7</CitationRef>]. In addition, members of miR-17 directly target <Emphasis Type="Italic">TGFBR2</Emphasis>, attenuate <Emphasis Type="Italic">TGF-β</Emphasis> signaling that regulates multitude of cellular processes, and is particularly relevant not only during development, but also in cancer initiation and progression [<CitationRef CitationID="CR7">7</CitationRef>,<CitationRef CitationID="CR8">8</CitationRef>]. Targets genes regulated by miRNAs are enriched for biological processes or pathways such as multicellular organismal development (GO:0007275; FDR = 3.31 × 10<Superscript>−04</Superscript>), neuron differentiation (GO:0030182; FDR = 3.85 × 10<Superscript>−04</Superscript>), regulation of cell adhesion (GO:0030155; FDR = 3.75 × 10<Superscript>−03</Superscript>), MAPK signalling <?show [?A3B2 twb=.3w?]?><?show [?A3B2 tlsb=.09pt?]?>pathways (hsa04010; FDR = 2.67 × 10<Superscript>−03</Superscript>), pathways in cancer (hsa05200; FDR = 3.60 × 10<Superscript>−03</Superscript>), extracellular matrix (ECM) receptor interaction (hsa04512; FDR = 1.22 × 10<Superscript>−02</Superscript>), and Integrin, EGF receptor, Wnt, and Neurotrophin signaling pathways (Additional file <InternalRef RefID="MOESM1">1</InternalRef>: Table S3 ). Enrichment of known cancer-related processes and pathways among miRNAs and target genes suggest that inferred miRNA-target relationships have functional roles in EPN.</Para><Para ID="Par12"><?show [?A3B2 twb=.3w?]?><?show [?A3B2 tlsb=.09pt?]?>The inferred putative target interactions from EPN formed a network with 11 highly interconnected subnetworks (Additional file <InternalRef RefID="MOESM2">2</InternalRef>: Figure S2). At least 50 of <?show [?A3B2 twb=.27w?]?><?show [?A3B2 tlsb=-.09pt?]?>the 390 EPN target interactions (comprising 25 miRNAs and 35 mRNAs) have strong evidence of recurrence in multiple cancer types (recurrence score &lt; −3.0 and FDR &lt; 0.05) on the basis of The Cancer Genome Atlas (TCGA) miRNA-target interactions analysis across 10 cancer types (Figure <InternalRef RefID="Fig1">1</InternalRef>, Additional file <InternalRef RefID="MOESM1">1</InternalRef>: Table S2) [<CitationRef CitationID="CR9">9</CitationRef>]. EPN interactions with high recurrence score include pairs such as miR-18a:<Emphasis Type="Italic">CREBL2</Emphasis> (REC score = −10.56; FDR = 1.81 × 10<Superscript>−07</Superscript>), miR-106b:<Emphasis Type="Italic">TGFBR2</Emphasis> (REC = −9.07; FDR = 2.52 × 10<Superscript>−06</Superscript>), and the interactions between the miR-29 family and <Emphasis Type="Italic">NREP</Emphasis> (REC = −19.74; FDR = 7.05 × 10<Superscript>−15</Superscript>), <Emphasis Type="Italic">UBTD2</Emphasis> (REC = −9.97; FDR = 4.99 × 10<Superscript>−07</Superscript>), and <Emphasis Type="Italic">MEX3B</Emphasis> (REC = −5.86; FDR = 6.64 × 10<Superscript>−04</Superscript>) that physically interacts with the <Emphasis Type="Italic">AGO1</Emphasis> gene, encoding a member of the Argonaute family of proteins which play a role in RNA interference by miRNAs via the RISC complex. The network also showed several novel EPN-specific interactions with genes that are involved in <?show [?A3B2 twb=.3w?]?><?show [?A3B2 tlsb=.09pt?]?>axon guidance (miR-29a:<Emphasis Type="Italic">LAMA2,</Emphasis> miR-29c:<Emphasis Type="Italic">LAMA2),</Emphasis> <?show [?A3B2 twb=.27w?]?><?show [?A3B2 tlsb=-.09pt?]?>histone H3-K27 methylation (miR-106B:<Emphasis Type="Italic">EZH1</Emphasis>), chromatin modification (miR-29c:<Emphasis Type="Italic">JARID2</Emphasis>), and methylation-dependent chromatin silencing (miR-29a:<Emphasis Type="Italic">DNMT3B</Emphasis>).<Figure ID="Fig1" Float="Yes" Category="Standard"><Caption Language="En"><CaptionNumber>Figure 1</CaptionNumber><?show [?A3B2 twb=.27w?]?><?show [?A3B2 tlsb=-.09pt?]?><CaptionContent><SimplePara>Ependymoma network of miRNA-mRNA target interactions. Two highly connected sub-networks from the inferred network of ependymoma comprising 390 putative target interactions between 107 miRNAs and 305 target mRNAs. Edge width represents strength of Spearman rank correlation for a given miRNA-mRNA pair, red edge colour represents evidence of recurrence in multiple cancer types, and miRNAs from the same family are color coded while a single miRNA is shown in white.</SimplePara></CaptionContent></Caption><MediaObject ID="MO1"><ImageObject FileRef="40478_2015_206_Fig1_HTML.gif" Format="GIF" Color="Color" Type="LinedrawHalftone" Rendition="HTML"/></MediaObject></Figure><Figure ID="Fig2" Float="Yes" Category="Standard"><Caption Language="En"><CaptionNumber>Figure 2</CaptionNumber><CaptionContent><SimplePara><!-- Query ID="Q4" Text="Figure 2 was received; however, no citation was provided in the manuscript. Please provide the location of where to insert the citation in the main body of the text. Otherwise, kindly advise us on how to proceed. Please note that figures should be cited in ascending numerical order and should be inside in the main body of the text." --><?show [?A3B2 twb=.27w?]?><?show [?A3B2 tlsb=-.09pt?]?>miR-29 family regulation of posterior fossa subgroup marker <Emphasis Type="Italic">LAMA2</Emphasis>. The relationship between <Emphasis Type="Italic">LAMA2</Emphasis> mRNA expression and miR-29a (left) and miR-29c (right) expression in tumor samples from ten different cancer types using Spearman rank correlation, showing strong association only in <?show [?A3B2 twb=.3w?]?><?show [?A3B2 tlsb=.09pt?]?>EPN. EPN: Ependymoma; GBM: Glioblastoma multiforme; OVA: Ovarian serous cystadenocarcinoma; COAD: Colon and rectal adenocarcinoma; <?show [?A3B2 twb=.27w?]?><?show [?A3B2 tlsb=-.09pt?]?>KIRC: Kidney renal clear cell carcinoma; LUSC: Lung squamous cell carcinoma; BRCA: Breast invasive carcinoma; UCEC: Uterine Corpus Endometrioid <?show [?A3B2 show $6#?]?>Carcinoma; BLCA: Bladder Urothelial Carcinoma; HNSC: Head and Neck squamous cell carcinoma.</SimplePara></CaptionContent></Caption><MediaObject ID="MO2"><ImageObject FileRef="40478_2015_206_Fig2_HTML.gif" Format="GIF" Color="Color" Type="LinedrawHalftone" Rendition="HTML"/></MediaObject></Figure><?show [?A3B2 "Float_Fig2",5,"conditions"?]?></Para><Para ID="Par13">Next, we asked whether the network represented by these putative target interactions captures the salient transcriptomic features of EPN subgroups, particularly from posterior fossa (PF). In line with earlier studies, a consensus clustering analysis of mRNA expression data among 64 EPN cases led to the identification of three transcriptional subtypes: largely supratentorial (ST, 37.5%), PF with spinal (SP) and ST (PF + SP + ST, 29.7%), and largely PF (PF, 32.8%) (Additional file <InternalRef RefID="MOESM2">2</InternalRef>: <?show [?A3B2 show $132#?]?>Figure S3). The group largely associated with PF (named as PFA) comprised predominantly of children with mean age of 3.5 years (range from 0.4 – 9.2 years), whereas the PF clustered with SP and ST (named as PFB) consisted of adults with a mean age of 24.5 years (range from 8 – 45 years) (Additional file <InternalRef RefID="MOESM2">2</InternalRef>: Figure S4). The differential expression analysis between the two PF subgroups detected a total of 46 mRNA targets as significant <?show [?A3B2 show\     ?]?>(FDR &lt; 0.05), and 27 of these were also differentially expressed in an independent dataset (P = 6.20 × 10<Superscript>−05</Superscript>, Fisher’s exact test) of 37 PF EPN from the previously published study (Additional file <InternalRef RefID="MOESM1">1</InternalRef>: Table S4). Remarkably, the direction of expression differences between two PF subgroups was same in both cohorts for all of the 27 overlapping differentially expressed genes (Additional file <InternalRef RefID="MOESM2">2</InternalRef>: Figure S4). Fifteen overlapping mRNA target genes showed high levels of expression in the PFA subgroup, of which four (<Emphasis Type="Italic">ACSL6</Emphasis>, <Emphasis Type="Italic">ATP1B2</Emphasis>, <Emphasis Type="Italic">CAMK2B</Emphasis>, <Emphasis Type="Italic">and S1PR1</Emphasis>) were regulated by miR-24, four (<Emphasis Type="Italic">ADAMTS9</Emphasis>, <Emphasis Type="Italic">BLMH</Emphasis>, <Emphasis Type="Italic">LAMA2</Emphasis>, and <Emphasis Type="Italic">NUDT11</Emphasis>) were regulated by the miR-29 family, three (<Emphasis Type="Italic">MMD</Emphasis>, <Emphasis Type="Italic">PKIA</Emphasis>, and <Emphasis Type="Italic">STK39</Emphasis>) were regulated by miR-27b, and <Emphasis Type="Italic">PDGFRA</Emphasis> was regulated by miR-34c and miR-218. Interestingly, <Emphasis Type="Italic">LAMA2</Emphasis> has previously been identified as a candidate maker gene for PFA subgroup <?show [?A3B2 twb=.3w?]?><?show [?A3B2 tlsb=.19pt?]?>and associated with poor prognosis [<CitationRef CitationID="CR3">3</CitationRef>,<CitationRef CitationID="CR10">10</CitationRef>,<CitationRef CitationID="CR11">11</CitationRef>]. In <?show [?A3B2 twb=.27w?]?><?show [?A3B2 tlsb=-.15pt?]?>addition to a strong miR29a:<Emphasis Type="Italic">LAMA2</Emphasis> association (<Emphasis Type="Italic">r</Emphasis> = −0.62; FDR = 1.18 × 10<Superscript>−05</Superscript>), we also observed an inverse correlation between <Emphasis Type="Italic">LAMA2</Emphasis> and miR29c (<Emphasis Type="Italic">r</Emphasis> = −0.49; FDR = 1.61 × 10<Superscript>−03</Superscript>) <?show [?A3B2 twb=.3w?]?><?show [?A3B2 tlsb=.19pt?]?>in EPN, but not in other cancer types <?show [?A3B2 show $132#?]?>(Figure <InternalRef RefID="Fig1">1</InternalRef>b). The two miR-29 family miRNAs are encoded at two different genomic loci, yet they <?show [?A3B2 twb=.3w?]?><?show [?A3B2 tlsb=.09pt?]?>showed anti-correlation with <Emphasis Type="Italic">LAMA2</Emphasis> in EPN, suggesting EPN-specific strong co-regulation of the miR-29 loci. Taken together, these results suggest that downregulation of <?show [?A3B2 twb=.27w?]?><?show [?A3B2 tlsb=-.09pt?]?>miR-29 family expression is a potent mechanism by which <Emphasis Type="Italic">LAMA2</Emphasis> expression is altered in PF ependymoma.</Para><Para ID="Par14"><?show [?A3B2 twb=.3w?]?><?show [?A3B2 tlsb=.19pt?]?>In summary, we identified miR-29a/c as novel regulators <?show [?A3B2 twb=.27w?]?><?show [?A3B2 tlsb=-.09pt?]?>of <Emphasis Type="Italic">LAMA2</Emphasis> in ependymoma based on miRNA-mRNA covariation and sequence-based target predictions. <?show [?A3B2 twb=.3w?]?><?show [?A3B2 tlsb=.09pt?]?>The decreased expression of miR-29a/c and elevated <Emphasis Type="Italic">LAMA2</Emphasis> expression are therefore defining features of PF ependymoma post-transcriptional regulation, indicating a key mechanism for molecular pathogenesis. Apart from changes in miRNA expression, other mechanisms (genetic or epigenetic) can contribute to <Emphasis Type="Italic">LAMA2</Emphasis> expression in PF ependymoma, which now mandates further investigation.</Para></Body><BodyRef FileRef="40478_2015_206_OnlinePDF.pdf" TargetType="OnlinePDF"/><ArticleBackmatter><ArticleNote Type="Misc"><Heading>Competing interests</Heading><SimplePara>The authors declare that they have no competing interests.</SimplePara></ArticleNote><ArticleNote Type="Misc"><Heading>Authors’ contributions</Heading><SimplePara>AL conceived and designed the study, collected and analyzed the data, interpreted results, and drafted the manuscript. RR interpreted results and drafted the manuscript. SS interpreted results and drafted the manuscript. RG interpreted results, drafted the manuscript, and obtained funding. All authors read and approved the final manuscript.</SimplePara></ArticleNote><Acknowledgments><Heading>Acknowledgments</Heading><SimplePara>This work was supported by the Air &amp; Ground Charity, Gentleman’s Night Out Fund and the Children’s Brain Tumour Research Centre (CBTRC).</SimplePara></Acknowledgments><Appendix ID="App1" OutputMedium="Online"><Section1 ID="Sec1"><Heading>Additional files</Heading><!-- Query ID="Q5" Text="Additional file 3 was received; however, no citation and no caption was provided in the manuscript. Please provide the location of where to insert the citation in the main body of the text. Otherwise, kindly advise us on how to proceed. Please note that additional files should be cited in ascending numerical order in the main body of the text." --><!-- Query ID="Q6" Text="As per journal requirements, every additional file must have a corresponding caption. In this regard, please be informed that the caption was taken from the additional <?A3B2 thyc=10?>e-file<?A3B2 thyc=5?> itself. Please advise if action taken appropriate and amend if necessary." --><Para ID="Par15"><MediaObject ID="MOESM1"><DataObject FileRef="40478_2015_206_MOESM1_ESM.pdf"><Caption Language="En"><CaptionNumber>Additional file 1: Table S1.</CaptionNumber><CaptionContent><SimplePara>Characteristics of ependymoma patients used in the current study. <Emphasis Type="Bold">Table S2.</Emphasis> Putative miRNA – target interactions from Ependymoma expression data. <Emphasis Type="Bold">Table S3.</Emphasis> Enrichment of biological processes and pathways. <Emphasis Type="Bold">Table S4</Emphasis>. Differential expression of miRNA target genes.</SimplePara></CaptionContent></Caption></DataObject></MediaObject><MediaObject ID="MOESM2"><DataObject FileRef="40478_2015_206_MOESM2_ESM.pdf"><Caption Language="En"><CaptionNumber>Additional file 2: Figure S1.</CaptionNumber><?show [?A3B2 twb=.27w?]?><?show [?A3B2 tlsb=-.15pt?]?><CaptionContent><SimplePara>miRNAs in the miRNA-target network are enriched for oncomir and tumor suppressor miRNAs. <Emphasis Type="Bold">Figure S2.</Emphasis> Inferred miRNA – target network comprising 390 putative targetinteractions between 107 evolutionarily conserved miRNAs and 305 target mRNAs. <Emphasis Type="Bold">Figure S3.</Emphasis> <?show [?A3B2 show $6#?]?>Performance of consensus clustering showing optimum partitioning of three ependymoma (EPN) subtypes. <Emphasis Type="Bold">Figure S4.</Emphasis> Box plot of age at diagnosis in two PF ependymoma subgroups showing PFA subgroup with younger and PFB subgroup with older ependymoma patients (Left).</SimplePara></CaptionContent></Caption></DataObject></MediaObject><MediaObject ID="MOESM3"><DataObject FileRef="40478_2015_206_MOESM3_ESM.pdf"><Caption Language="En"><CaptionNumber>Additional file 3:</CaptionNumber><CaptionContent><?show [?A3B2 }skip?]?><SimplePara>(PDF 127 kb)</SimplePara><?show [?A3B2 :skip?]?></CaptionContent></Caption></DataObject></MediaObject></Para></Section1></Appendix><Bibliography ID="Bib1"><Heading>References</Heading><Citation ID="CR1"><CitationNumber>1.</CitationNumber><?show [?A3B2 twb=.27w?]?><?show [?A3B2 tlsb=-.09pt?]?><BibArticle><BibAuthorName><Initials>M</Initials><FamilyName>Hasselblatt</FamilyName></BibAuthorName><Year>2009</Year><ArticleTitle Language="En">Ependymal tumors</ArticleTitle><JournalTitle>Recent Results Cancer Res</JournalTitle><VolumeID>171</VolumeID><FirstPage>51</FirstPage><LastPage>66</LastPage></BibArticle><BibUnstructured>Hasselblatt M (2009) Ependymal tumors. Recent Results Cancer Res 171:51–66</BibUnstructured></Citation><Citation ID="CR2"><CitationNumber>2.</CitationNumber><BibArticle><BibAuthorName><Initials>RA</Initials><FamilyName>Johnson</FamilyName></BibAuthorName><BibAuthorName><Initials>KD</Initials><FamilyName>Wright</FamilyName></BibAuthorName><BibAuthorName><Initials>H</Initials><FamilyName>Poppleton</FamilyName></BibAuthorName><BibAuthorName><Initials>KM</Initials><FamilyName>Mohankumar</FamilyName></BibAuthorName><BibAuthorName><Initials>D</Initials><FamilyName>Finkelstein</FamilyName></BibAuthorName><BibAuthorName><Initials>SB</Initials><FamilyName>Pounds</FamilyName></BibAuthorName><BibAuthorName><Initials>V</Initials><FamilyName>Rand</FamilyName></BibAuthorName><BibAuthorName><Initials>SE</Initials><FamilyName>Leary</FamilyName></BibAuthorName><BibAuthorName><Initials>E</Initials><FamilyName>White</FamilyName></BibAuthorName><BibAuthorName><Initials>C</Initials><FamilyName>Eden</FamilyName></BibAuthorName><BibAuthorName><Initials>T</Initials><FamilyName>Hogg</FamilyName></BibAuthorName><BibAuthorName><Initials>P</Initials><FamilyName>Northcott</FamilyName></BibAuthorName><BibAuthorName><Initials>S</Initials><FamilyName>Mack</FamilyName></BibAuthorName><BibAuthorName><Initials>G</Initials><FamilyName>Neale</FamilyName></BibAuthorName><BibAuthorName><Initials>YD</Initials><FamilyName>Wang</FamilyName></BibAuthorName><BibAuthorName><Initials>B</Initials><FamilyName>Coyle</FamilyName></BibAuthorName><BibAuthorName><Initials>J</Initials><FamilyName>Atkinson</FamilyName></BibAuthorName><BibAuthorName><Initials>M</Initials><FamilyName>DeWire</FamilyName></BibAuthorName><BibAuthorName><Initials>TA</Initials><FamilyName>Kranenburg</FamilyName></BibAuthorName><BibAuthorName><Initials>Y</Initials><FamilyName>Gillespie</FamilyName></BibAuthorName><BibAuthorName><Initials>JC</Initials><FamilyName>Allen</FamilyName></BibAuthorName><BibAuthorName><Initials>T</Initials><FamilyName>Merchant</FamilyName></BibAuthorName><BibAuthorName><Initials>FA</Initials><FamilyName>Boop</FamilyName></BibAuthorName><BibAuthorName><Initials>RA</Initials><FamilyName>Sanford</FamilyName></BibAuthorName><BibAuthorName><Initials>A</Initials><FamilyName>Gajjar</FamilyName></BibAuthorName><BibAuthorName><Initials>DW</Initials><FamilyName>Ellison</FamilyName></BibAuthorName><BibAuthorName><Initials>MD</Initials><FamilyName>Taylor</FamilyName></BibAuthorName><BibAuthorName><Initials>RG</Initials><FamilyName>Grundy</FamilyName></BibAuthorName><BibAuthorName><Initials>RJ</Initials><FamilyName>Gilbertson</FamilyName></BibAuthorName><Year>2010</Year><ArticleTitle Language="En">Cross-species genomics matches driver mutations and cell compartments to model ependymoma</ArticleTitle><JournalTitle>Nature</JournalTitle><VolumeID>466</VolumeID><IssueID>7306</IssueID><FirstPage>632</FirstPage><LastPage>636</LastPage></BibArticle><BibUnstructured>Johnson RA, Wright KD, Poppleton H, Mohankumar KM, Finkelstein D, Pounds SB, Rand V, Leary SE, White E, Eden C, Hogg T, Northcott P, Mack S, Neale G, Wang YD, Coyle B, Atkinson J, DeWire M, Kranenburg TA, Gillespie Y, Allen JC, Merchant T, Boop FA, Sanford RA, Gajjar A, Ellison DW, Taylor MD, Grundy RG, Gilbertson RJ (2010) Cross-species genomics matches driver mutations and cell compartments to model ependymoma. Nature 466(7306):632–636</BibUnstructured></Citation><Citation ID="CR3"><CitationNumber>3.</CitationNumber><BibArticle><BibAuthorName><Initials>H</Initials><FamilyName>Witt</FamilyName></BibAuthorName><BibAuthorName><Initials>SC</Initials><FamilyName>Mack</FamilyName></BibAuthorName><BibAuthorName><Initials>M</Initials><FamilyName>Ryzhova</FamilyName></BibAuthorName><BibAuthorName><Initials>S</Initials><FamilyName>Bender</FamilyName></BibAuthorName><BibAuthorName><Initials>M</Initials><FamilyName>Sill</FamilyName></BibAuthorName><BibAuthorName><Initials>R</Initials><FamilyName>Isserlin</FamilyName></BibAuthorName><BibAuthorName><Initials>A</Initials><FamilyName>Benner</FamilyName></BibAuthorName><BibAuthorName><Initials>T</Initials><FamilyName>Hielscher</FamilyName></BibAuthorName><BibAuthorName><Initials>T</Initials><FamilyName>Milde</FamilyName></BibAuthorName><BibAuthorName><Initials>M</Initials><FamilyName>Remke</FamilyName></BibAuthorName><BibAuthorName><Initials>DT</Initials><FamilyName>Jones</FamilyName></BibAuthorName><BibAuthorName><Initials>PA</Initials><FamilyName>Northcott</FamilyName></BibAuthorName><BibAuthorName><Initials>L</Initials><FamilyName>Garzia</FamilyName></BibAuthorName><BibAuthorName><Initials>KC</Initials><FamilyName>Bertrand</FamilyName></BibAuthorName><BibAuthorName><Initials>A</Initials><FamilyName>Wittmann</FamilyName></BibAuthorName><BibAuthorName><Initials>Y</Initials><FamilyName>Yao</FamilyName></BibAuthorName><BibAuthorName><Initials>SS</Initials><FamilyName>Roberts</FamilyName></BibAuthorName><BibAuthorName><Initials>L</Initials><FamilyName>Massimi</FamilyName></BibAuthorName><BibAuthorName><Initials>T</Initials><FamilyName>Meter</FamilyName><Particle>Van</Particle></BibAuthorName><BibAuthorName><Initials>WA</Initials><FamilyName>Weiss</FamilyName></BibAuthorName><BibAuthorName><Initials>N</Initials><FamilyName>Gupta</FamilyName></BibAuthorName><BibAuthorName><Initials>W</Initials><FamilyName>Grajkowska</FamilyName></BibAuthorName><BibAuthorName><Initials>B</Initials><FamilyName>Lach</FamilyName></BibAuthorName><BibAuthorName><Initials>YJ</Initials><FamilyName>Cho</FamilyName></BibAuthorName><BibAuthorName><Initials>A</Initials><FamilyName>Deimling</FamilyName><Particle>von</Particle></BibAuthorName><BibAuthorName><Initials>AE</Initials><FamilyName>Kulozik</FamilyName></BibAuthorName><BibAuthorName><Initials>O</Initials><FamilyName>Witt</FamilyName></BibAuthorName><BibAuthorName><Initials>GD</Initials><FamilyName>Bader</FamilyName></BibAuthorName><BibAuthorName><Initials>CE</Initials><FamilyName>Hawkins</FamilyName></BibAuthorName><BibAuthorName><Initials>U</Initials><FamilyName>Tabori</FamilyName></BibAuthorName><Etal/><Year>2011</Year><ArticleTitle Language="En">Delineation of two clinically and molecularly distinct subgroups of posterior fossa ependymoma</ArticleTitle><JournalTitle>Cancer Cell</JournalTitle><VolumeID>20</VolumeID><IssueID>2</IssueID><FirstPage>143</FirstPage><LastPage>157</LastPage></BibArticle><BibUnstructured>Witt H, Mack SC, Ryzhova M, Bender S, Sill M, Isserlin R, Benner A, Hielscher T, Milde T, Remke M, Jones DT, Northcott PA, Garzia L, Bertrand KC, Wittmann A, Yao Y, Roberts SS, Massimi L, Van Meter T, Weiss WA, Gupta N, Grajkowska W, Lach B, Cho YJ, von Deimling A, Kulozik AE, Witt O, Bader GD, Hawkins CE, Tabori U et al (2011) Delineation of two clinically and molecularly distinct subgroups of posterior fossa ependymoma. Cancer Cell 20(2):143–157</BibUnstructured></Citation><Citation ID="CR4"><CitationNumber>4.</CitationNumber><BibArticle><BibAuthorName><Initials>SC</Initials><FamilyName>Mack</FamilyName></BibAuthorName><BibAuthorName><Initials>H</Initials><FamilyName>Witt</FamilyName></BibAuthorName><BibAuthorName><Initials>RM</Initials><FamilyName>Piro</FamilyName></BibAuthorName><BibAuthorName><Initials>L</Initials><FamilyName>Gu</FamilyName></BibAuthorName><BibAuthorName><Initials>S</Initials><FamilyName>Zuyderduyn</FamilyName></BibAuthorName><BibAuthorName><Initials>AM</Initials><FamilyName>Stutz</FamilyName></BibAuthorName><BibAuthorName><Initials>X</Initials><FamilyName>Wang</FamilyName></BibAuthorName><BibAuthorName><Initials>M</Initials><FamilyName>Gallo</FamilyName></BibAuthorName><BibAuthorName><Initials>L</Initials><FamilyName>Garzia</FamilyName></BibAuthorName><BibAuthorName><Initials>K</Initials><FamilyName>Zayne</FamilyName></BibAuthorName><BibAuthorName><Initials>X</Initials><FamilyName>Zhang</FamilyName></BibAuthorName><BibAuthorName><Initials>V</Initials><FamilyName>Ramaswamy</FamilyName></BibAuthorName><BibAuthorName><Initials>N</Initials><FamilyName>Jager</FamilyName></BibAuthorName><BibAuthorName><Initials>DT</Initials><FamilyName>Jones</FamilyName></BibAuthorName><BibAuthorName><Initials>M</Initials><FamilyName>Sill</FamilyName></BibAuthorName><BibAuthorName><Initials>TJ</Initials><FamilyName>Pugh</FamilyName></BibAuthorName><BibAuthorName><Initials>M</Initials><FamilyName>Ryzhova</FamilyName></BibAuthorName><BibAuthorName><Initials>KM</Initials><FamilyName>Wani</FamilyName></BibAuthorName><BibAuthorName><Initials>DJ</Initials><FamilyName>Shih</FamilyName></BibAuthorName><BibAuthorName><Initials>R</Initials><FamilyName>Head</FamilyName></BibAuthorName><BibAuthorName><Initials>M</Initials><FamilyName>Remke</FamilyName></BibAuthorName><BibAuthorName><Initials>SD</Initials><FamilyName>Bailey</FamilyName></BibAuthorName><BibAuthorName><Initials>T</Initials><FamilyName>Zichner</FamilyName></BibAuthorName><BibAuthorName><Initials>CC</Initials><FamilyName>Faria</FamilyName></BibAuthorName><BibAuthorName><Initials>M</Initials><FamilyName>Barszczyk</FamilyName></BibAuthorName><BibAuthorName><Initials>S</Initials><FamilyName>Stark</FamilyName></BibAuthorName><BibAuthorName><Initials>H</Initials><FamilyName>Seker-Cin</FamilyName></BibAuthorName><BibAuthorName><Initials>S</Initials><FamilyName>Hutter</FamilyName></BibAuthorName><BibAuthorName><Initials>P</Initials><FamilyName>Johann</FamilyName></BibAuthorName><BibAuthorName><Initials>S</Initials><FamilyName>Bender</FamilyName></BibAuthorName><Etal/><Year>2014</Year><ArticleTitle Language="En">Epigenomic alterations define lethal CIMP-positive ependymomas of infancy</ArticleTitle><JournalTitle>Nature</JournalTitle><VolumeID>506</VolumeID><IssueID>7489</IssueID><FirstPage>445</FirstPage><LastPage>450</LastPage></BibArticle><BibUnstructured>Mack SC, Witt H, Piro RM, Gu L, Zuyderduyn S, Stutz AM, Wang X, Gallo M, Garzia L, Zayne K, Zhang X, Ramaswamy V, Jager N, Jones DT, Sill M, Pugh TJ, Ryzhova M, Wani KM, Shih DJ, Head R, Remke M, Bailey SD, Zichner T, Faria CC, Barszczyk M, Stark S, Seker-Cin H, Hutter S, Johann P, Bender S et al (2014) Epigenomic alterations define lethal CIMP-positive ependymomas of infancy. Nature 506(7489):445–450</BibUnstructured></Citation><Citation ID="CR5"><CitationNumber>5.</CitationNumber><BibArticle><BibAuthorName><Initials>D</Initials><FamilyName>Betel</FamilyName></BibAuthorName><BibAuthorName><Initials>A</Initials><FamilyName>Koppal</FamilyName></BibAuthorName><BibAuthorName><Initials>P</Initials><FamilyName>Agius</FamilyName></BibAuthorName><BibAuthorName><Initials>C</Initials><FamilyName>Sander</FamilyName></BibAuthorName><BibAuthorName><Initials>C</Initials><FamilyName>Leslie</FamilyName></BibAuthorName><Year>2010</Year><ArticleTitle Language="En">Comprehensive modeling of microRNA targets predicts functional non-conserved and non-canonical sites</ArticleTitle><JournalTitle>Genome biology</JournalTitle><VolumeID>11</VolumeID><IssueID>8</IssueID><FirstPage>R90</FirstPage></BibArticle><BibUnstructured>Betel D, Koppal A, Agius P, Sander C, Leslie C (2010) Comprehensive modeling of microRNA targets predicts functional non-conserved and <?show [?A3B2 show $6#?]?>non-canonical sites. Genome biology 11(8):R90</BibUnstructured></Citation><Citation ID="CR6"><CitationNumber>6.</CitationNumber><BibArticle><BibAuthorName><Initials>A</Initials><FamilyName>Grimson</FamilyName></BibAuthorName><BibAuthorName><Initials>KK</Initials><FamilyName>Farh</FamilyName></BibAuthorName><BibAuthorName><Initials>WK</Initials><FamilyName>Johnston</FamilyName></BibAuthorName><BibAuthorName><Initials>P</Initials><FamilyName>Garrett-Engele</FamilyName></BibAuthorName><BibAuthorName><Initials>LP</Initials><FamilyName>Lim</FamilyName></BibAuthorName><BibAuthorName><Initials>DP</Initials><FamilyName>Bartel</FamilyName></BibAuthorName><Year>2007</Year><ArticleTitle Language="En">MicroRNA targeting specificity in mammals: determinants beyond seed pairing</ArticleTitle><JournalTitle>Molecular cell</JournalTitle><VolumeID>27</VolumeID><IssueID>1</IssueID><FirstPage>91</FirstPage><LastPage>105</LastPage></BibArticle><BibUnstructured>Grimson A, Farh KK, Johnston WK, Garrett-Engele P, Lim LP, Bartel DP (2007) MicroRNA targeting specificity in mammals: determinants beyond seed pairing. Molecular cell 27(1):91–105</BibUnstructured></Citation><Citation ID="CR7"><CitationNumber>7.</CitationNumber><BibArticle><BibAuthorName><Initials>E</Initials><FamilyName>Mogilyansky</FamilyName></BibAuthorName><BibAuthorName><Initials>I</Initials><FamilyName>Rigoutsos</FamilyName></BibAuthorName><Year>2013</Year><ArticleTitle Language="En">The miR-17/92 cluster: a comprehensive update on its genomics, genetics, functions and increasingly important and numerous roles in health and disease</ArticleTitle><JournalTitle>Cell death and differentiation</JournalTitle><VolumeID>20</VolumeID><IssueID>12</IssueID><FirstPage>1603</FirstPage><LastPage>1614</LastPage></BibArticle><BibUnstructured>Mogilyansky E, Rigoutsos I (2013) The miR-17/92 cluster: a comprehensive update on its genomics, genetics, functions and increasingly important and numerous roles in health and disease. Cell death and differentiation 20(12):1603–1614</BibUnstructured></Citation><Citation ID="CR8"><CitationNumber>8.</CitationNumber><?show [?A3B2 twb=.27w?]?><?show [?A3B2 tlsb=-.09pt?]?><BibArticle><BibAuthorName><Initials>M</Initials><FamilyName>Dews</FamilyName></BibAuthorName><BibAuthorName><Initials>JL</Initials><FamilyName>Fox</FamilyName></BibAuthorName><BibAuthorName><Initials>S</Initials><FamilyName>Hultine</FamilyName></BibAuthorName><BibAuthorName><Initials>P</Initials><FamilyName>Sundaram</FamilyName></BibAuthorName><BibAuthorName><Initials>W</Initials><FamilyName>Wang</FamilyName></BibAuthorName><BibAuthorName><Initials>YY</Initials><FamilyName>Liu</FamilyName></BibAuthorName><BibAuthorName><Initials>E</Initials><FamilyName>Furth</FamilyName></BibAuthorName><BibAuthorName><Initials>GH</Initials><FamilyName>Enders</FamilyName></BibAuthorName><BibAuthorName><Initials>W</Initials><FamilyName>El-Deiry</FamilyName></BibAuthorName><BibAuthorName><Initials>JM</Initials><FamilyName>Schelter</FamilyName></BibAuthorName><BibAuthorName><Initials>MA</Initials><FamilyName>Cleary</FamilyName></BibAuthorName><BibAuthorName><Initials>A</Initials><FamilyName>Thomas-Tikhonenko</FamilyName></BibAuthorName><Year>2010</Year><ArticleTitle Language="En">The myc-miR-17 ~ 92 axis blunts TGF{beta} signaling and production of multiple TGF{beta}-dependent antiangiogenic factors</ArticleTitle><JournalTitle>Cancer research</JournalTitle><VolumeID>70</VolumeID><IssueID>20</IssueID><FirstPage>8233</FirstPage><LastPage>8246</LastPage></BibArticle><BibUnstructured>Dews M, Fox JL, Hultine S, Sundaram P, Wang W, Liu YY, Furth E, Enders GH, <?show [?A3B2 show $6#?]?>El-Deiry W, Schelter JM, Cleary MA, Thomas-Tikhonenko A (2010) The myc-miR-17 ~ 92 axis blunts TGF{beta} signaling and production of multiple TGF{beta}-dependent antiangiogenic factors. Cancer research 70(20):8233–8246</BibUnstructured></Citation><Citation ID="CR9"><CitationNumber>9.</CitationNumber><?show [?A3B2 twb=.27w?]?><?show [?A3B2 tlsb=-.09pt?]?><BibArticle><BibAuthorName><Initials>A</Initials><FamilyName>Jacobsen</FamilyName></BibAuthorName><BibAuthorName><Initials>J</Initials><FamilyName>Silber</FamilyName></BibAuthorName><BibAuthorName><Initials>G</Initials><FamilyName>Harinath</FamilyName></BibAuthorName><BibAuthorName><Initials>JT</Initials><FamilyName>Huse</FamilyName></BibAuthorName><BibAuthorName><Initials>N</Initials><FamilyName>Schultz</FamilyName></BibAuthorName><BibAuthorName><Initials>C</Initials><FamilyName>Sander</FamilyName></BibAuthorName><Year>2013</Year><ArticleTitle Language="En">Analysis of microRNA-target interactions across diverse cancer types</ArticleTitle><JournalTitle>Nature structural &amp; molecular biology</JournalTitle><VolumeID>20</VolumeID><IssueID>11</IssueID><FirstPage>1325</FirstPage><LastPage>1332</LastPage></BibArticle><BibUnstructured>Jacobsen A, Silber J, Harinath G, Huse JT, Schultz N, Sander C (2013) Analysis of microRNA-target interactions across diverse cancer types. Nature structural &amp; molecular biology 20(11):1325–1332</BibUnstructured></Citation><Citation ID="CR10"><CitationNumber>10.</CitationNumber><BibArticle><BibAuthorName><Initials>LM</Initials><FamilyName>Hoffman</FamilyName></BibAuthorName><BibAuthorName><Initials>AM</Initials><FamilyName>Donson</FamilyName></BibAuthorName><BibAuthorName><Initials>I</Initials><FamilyName>Nakachi</FamilyName></BibAuthorName><BibAuthorName><Initials>AM</Initials><FamilyName>Griesinger</FamilyName></BibAuthorName><BibAuthorName><Initials>DK</Initials><FamilyName>Birks</FamilyName></BibAuthorName><BibAuthorName><Initials>V</Initials><FamilyName>Amani</FamilyName></BibAuthorName><BibAuthorName><Initials>MS</Initials><FamilyName>Hemenway</FamilyName></BibAuthorName><BibAuthorName><Initials>AK</Initials><FamilyName>Liu</FamilyName></BibAuthorName><BibAuthorName><Initials>M</Initials><FamilyName>Wang</FamilyName></BibAuthorName><BibAuthorName><Initials>TC</Initials><FamilyName>Hankinson</FamilyName></BibAuthorName><BibAuthorName><Initials>MH</Initials><FamilyName>Handler</FamilyName></BibAuthorName><BibAuthorName><Initials>NK</Initials><FamilyName>Foreman</FamilyName></BibAuthorName><Year>2014</Year><ArticleTitle Language="En">Molecular sub-group-specific immunophenotypic changes are associated with outcome in recurrent posterior fossa ependymoma</ArticleTitle><JournalTitle>Acta neuropathologica</JournalTitle><VolumeID>127</VolumeID><IssueID>5</IssueID><FirstPage>731</FirstPage><LastPage>745</LastPage></BibArticle><BibUnstructured>Hoffman LM, Donson AM, Nakachi I, Griesinger AM, Birks DK, Amani V, Hemenway MS, Liu AK, Wang M, Hankinson TC, Handler MH, Foreman NK (2014) Molecular sub-group-specific immunophenotypic changes are <?show [?A3B2 show $6#?]?>associated with outcome in recurrent posterior fossa ependymoma. Acta neuropathologica 127(5):731–745</BibUnstructured></Citation><Citation ID="CR11"><CitationNumber>11.</CitationNumber><BibArticle><BibAuthorName><Initials>K</Initials><FamilyName>Wani</FamilyName></BibAuthorName><BibAuthorName><Initials>TS</Initials><FamilyName>Armstrong</FamilyName></BibAuthorName><BibAuthorName><Initials>E</Initials><FamilyName>Vera-Bolanos</FamilyName></BibAuthorName><BibAuthorName><Initials>A</Initials><FamilyName>Raghunathan</FamilyName></BibAuthorName><BibAuthorName><Initials>D</Initials><FamilyName>Ellison</FamilyName></BibAuthorName><BibAuthorName><Initials>R</Initials><FamilyName>Gilbertson</FamilyName></BibAuthorName><BibAuthorName><Initials>B</Initials><FamilyName>Vaillant</FamilyName></BibAuthorName><BibAuthorName><Initials>S</Initials><FamilyName>Goldman</FamilyName></BibAuthorName><BibAuthorName><Initials>RJ</Initials><FamilyName>Packer</FamilyName></BibAuthorName><BibAuthorName><Initials>M</Initials><FamilyName>Fouladi</FamilyName></BibAuthorName><BibAuthorName><Initials>I</Initials><FamilyName>Pollack</FamilyName></BibAuthorName><BibAuthorName><Initials>T</Initials><FamilyName>Mikkelsen</FamilyName></BibAuthorName><BibAuthorName><Initials>M</Initials><FamilyName>Prados</FamilyName></BibAuthorName><BibAuthorName><Initials>A</Initials><FamilyName>Omuro</FamilyName></BibAuthorName><BibAuthorName><Initials>R</Initials><FamilyName>Soffietti</FamilyName></BibAuthorName><BibAuthorName><Initials>A</Initials><FamilyName>Ledoux</FamilyName></BibAuthorName><BibAuthorName><Initials>C</Initials><FamilyName>Wilson</FamilyName></BibAuthorName><BibAuthorName><Initials>L</Initials><FamilyName>Long</FamilyName></BibAuthorName><BibAuthorName><Initials>MR</Initials><FamilyName>Gilbert</FamilyName></BibAuthorName><BibAuthorName><Initials>K</Initials><FamilyName>Aldape</FamilyName></BibAuthorName><BibAuthorName><Initials>N</Initials><FamilyName>Collaborative Ependymoma Research</FamilyName></BibAuthorName><Year>2012</Year><ArticleTitle Language="En">A prognostic gene expression signature in infratentorial ependymoma</ArticleTitle><JournalTitle>Acta neuropathologica</JournalTitle><VolumeID>123</VolumeID><IssueID>5</IssueID><FirstPage>727</FirstPage><LastPage>738</LastPage></BibArticle><BibUnstructured>Wani K, Armstrong TS, Vera-Bolanos E, Raghunathan A, Ellison D, Gilbertson R, Vaillant B, Goldman S, Packer RJ, Fouladi M, Pollack I, Mikkelsen T, Prados M, Omuro A, Soffietti R, Ledoux A, Wilson C, Long L, Gilbert MR, Aldape K, Collaborative Ependymoma Research N (2012) A prognostic gene <?show [?A3B2 show $6#?]?>expression signature in infratentorial ependymoma. Acta neuropathologica 123(5):727–738</BibUnstructured></Citation></Bibliography></ArticleBackmatter></Article>
